# Supplementary material for: The Expression Profile of Dental Pulp-Derived Stromal Cells Supports Their Limited Capacity to Differentiate into Adipogenic Cells
Source: MDPI journal article supplement (doi:10.3390/ijms21082753), 2020-04-15
Supplement: s1 [file s1]

Supplementary Materials

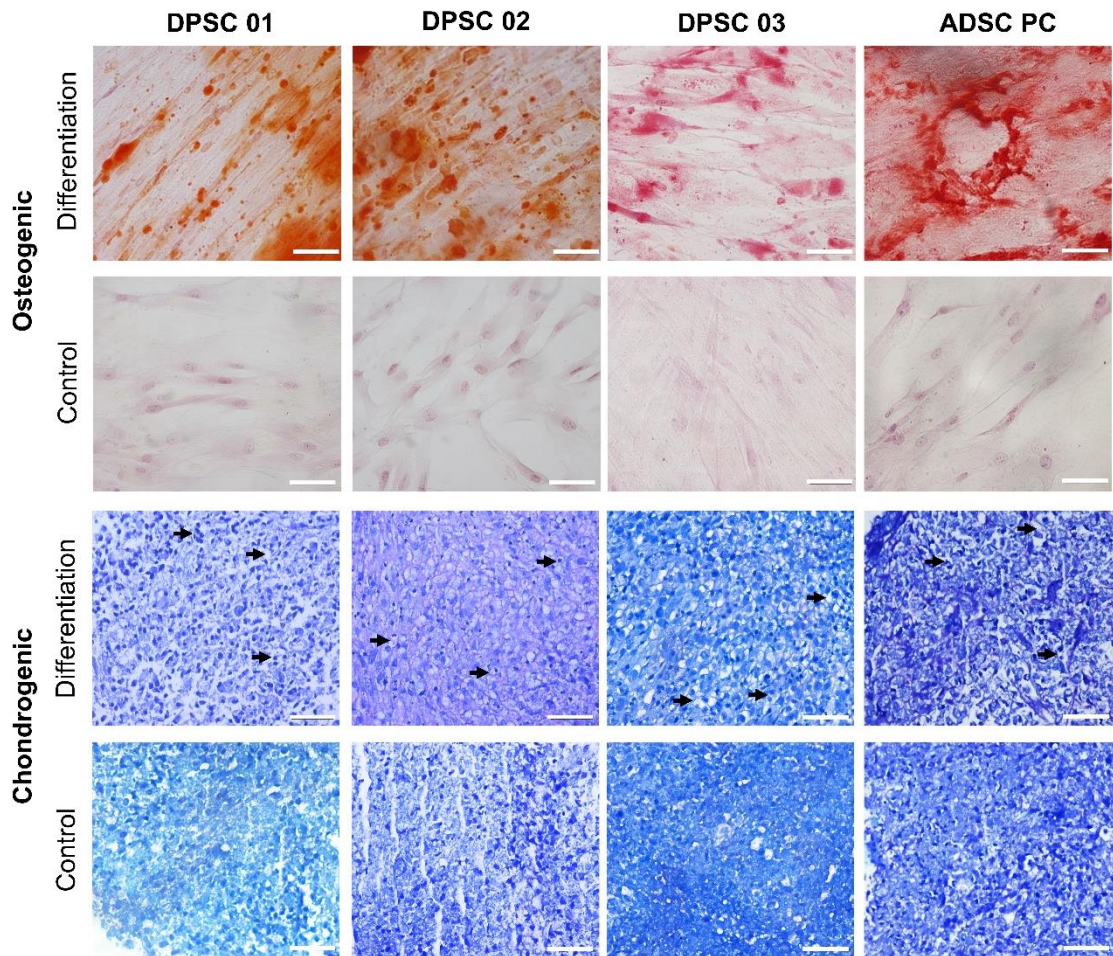

**Figure S1.** In vitro osteogenic and chondrogenic differentiation. Comparison between the positive control (ADSC) and three samples of DPSCs. Osteogenic differentiation: characterised by the presence of calcium deposits when stained with Alizarin Red S. Chondrogenic differentiation: characterized by the presence of vacuoles around young chondrocytes (arrows) staining with toluidine blue at the cartilaginous matrix. Scale bar: 50 µm. ADSC: adipose tissue-derived stromal cells; DPSC: dental pulp-derived stromal cells.

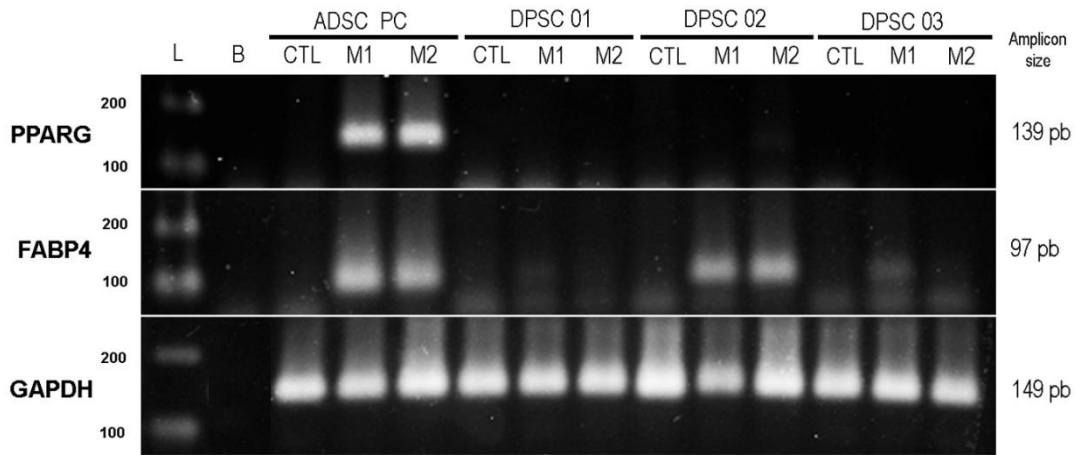

**Figure S2.** Expression of the PPARG and FABP4 markers of adipogenesis by RT-PCR. Comparison between the positive control (ADSCs) and three samples of DPSCs. CTL: control; M1: commercial culture medium; M2: custom culture medium; L: ladder, B: blank; PPARG: peroxisome proliferator-

activated receptor gamma; FABP4: fatty acid binding protein 4; GAPDH: glyceraldehyde-3-phosphate dehydrogenase, housekeeping gene; ADSC: adipose tissue-derived stromal cells; DPSC: dental pulp-derived stromal cells.

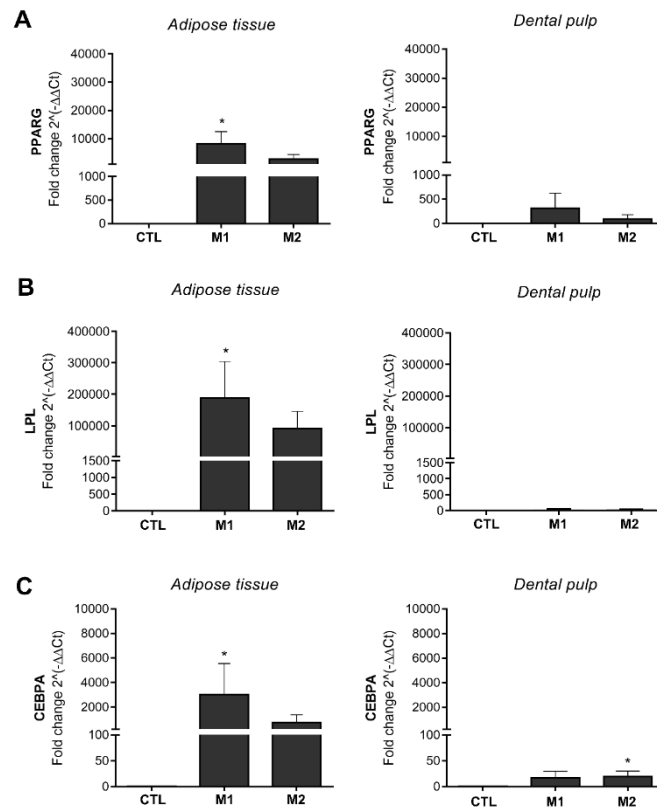

**Figure S3.** Expression of markers of adipogenesis by qRT-PCR. Fold changes (q-PCR  $2^{-\Delta\Delta C_t}$  method) of (A) PPARG, (B) LPL and (C) CEBPA in ADSCs and DPSCs. CTL: control; M1: commercial culture medium; M2: custom culture medium; PPARG: peroxisome proliferator-activated receptor gamma; LPL: lipoprotein lipase; CEBPA: CCAAT/enhancer-binding protein alpha; ADSCs: adipose tissue-derived stromal cells; DPSCs: dental pulp-derived stromal cells. Values are given as fold change  $\pm$  SEM; One-way ANOVA, with multiple comparisons: \* $p < 0.05$ .

**Table S1.** Published data on DPSC adipogenesis potential.

| Authors                      | Isolation: method                                                                                        | Differentiation according to authors                                                                                                                                                                           | Induction medium                                                                                                                                                                  | Induction time    | Evaluation method |                                         |
|------------------------------|----------------------------------------------------------------------------------------------------------|----------------------------------------------------------------------------------------------------------------------------------------------------------------------------------------------------------------|-----------------------------------------------------------------------------------------------------------------------------------------------------------------------------------|-------------------|-------------------|-----------------------------------------|
|                              |                                                                                                          |                                                                                                                                                                                                                |                                                                                                                                                                                   |                   | Staining          | Other technique                         |
| Gronthos et al., 2000 [6]    | 3 mg/mL Collagenase type I and 4 mg/mL dispase for 1 hour at 37 °C                                       | No                                                                                                                                                                                                             | *L-ascorbate-2-phosphate;<br>*dexamethasone with inorganic phosphate                                                                                                              | 6 weeks           | No                | No                                      |
| Gronthos et al., 2002 [24]   | 3 mg/mL Collagenase type I and 4 mg/mL dispase for 1 hour at 37 °C                                       | Yes                                                                                                                                                                                                            | * 0.5 mM isobutylmethylxanthine<br>* 0.5 µM hydrocortisone<br>* 60 µM indomethacin                                                                                                | 5 weeks           | Oil red           | RT-PCR: PPARG2 and LPL (control: GAPDH) |
| Struys et al., 2011 [23]     | Explants. The explants were left undisturbed for 14 days to allow the migration of cells.                | Oil red staining did not reveal any intracellular lipid droplets following the adipogenic differentiation of DPSC, with the exception of 30% of the tests, in which a few Oil red positive cells were observed | Adipogenic differentiation medium (R&D Systems)                                                                                                                                   | 3 weeks           | Oil red           | Immunocytochemistry (FABP)              |
| Tamaki et al., 2013 [7]      | 3 mg/mL collagenase type I and 4 mg/mL dispase for 1 hour at 37 °C                                       | Yes                                                                                                                                                                                                            | α MEM containing 10% FBS<br>* 0.5 mM isobutylmethylxanthine 1<br>* 0.5 µM hydrocortisone<br>* 60 µM indomethacin                                                                  | 3 weeks           | Oil red           | —                                       |
| Chang et al., 2014 [47]      | 3 mg/mL Collagenase type I and 4 mg/mL dispase for 1 hour at 37 °C                                       | Yes                                                                                                                                                                                                            | —                                                                                                                                                                                 | 15 days           | Oil red           | PCR: PPARG and LPL                      |
| Kumar et al., 2015 [22]      | Explant                                                                                                  | Yes                                                                                                                                                                                                            | αMEM supplemented with 10 % FBS<br>* 0.5 mM isobutyl-methylxanthine (IBMX)<br>* 1 µM dexamethasone<br>* 200 µM indomethacin<br>* 10 µM insulin                                    | 3 weeks           | Oil red           | Oil red O quantification by ELISA       |
| Alsulaimani et al., 2016 [9] | Collagenase type I (250 units/mg) freshly mixed with 1 mL of dispase (5000 caseinolytic units in 100 mL) | Yes                                                                                                                                                                                                            | DMEM supplemented with 10% FBS<br>* 10% horse serum<br>* 1% pen-strep<br>* 100 nM dexamethasone<br>* 0.45 mM isobutyl methylxanthine<br>* 3 µg/mL insulin<br>* 1 µM rosiglitazone | 7, 14 and 21 days | Oil red           | RT-PCR: PPAR-G2 and activated protein-2 |

|                         |                                                                                                 |     |                                                                                                                                                                                                                                                                                                                                                                                                 |         |         |                                                |
|-------------------------|-------------------------------------------------------------------------------------------------|-----|-------------------------------------------------------------------------------------------------------------------------------------------------------------------------------------------------------------------------------------------------------------------------------------------------------------------------------------------------------------------------------------------------|---------|---------|------------------------------------------------|
| Isobe et al., 2016 [8]  | 0.3% Collagenase type I and 0.4% dispase 1 hour at 37 °C                                        | Yes | Induction medium<br>*αMEM com 20% FBS<br>*2 mM L-glutamine<br>*60 μM indomethacin<br>*100 μM L-ascorbic acid 2-phosphate<br>*0.5 mM isobutyl methylxanthine<br>*0.5 μM hydrocortisone<br>*10 μg/mL insulin<br>*100 U/ml pen/strep<br>Maintenance medium<br>*αMEM supplemented with 20% FBS<br>*2 mM L-glutamine<br>*100 μM L-ascorbic acid 2-phosphate<br>*10 μg/mL insulin *100 U/mL pen/strep | 28 days | Oil red | RT-PCR: PPARG2 and LPL (control: GAPDH)        |
| Ullah et al., 2016 [10] | PBS supplemented with 1 mg/mL collagenase type I at 37 °C with frequent shaking for 40 minutes. | Yes | *1 μM dexamethasone<br>*10 μM insulin<br>*100 μM indomethacin<br>*500 μM isobutylmethyl xanthine (IBMX)                                                                                                                                                                                                                                                                                         | 21 days | Oil red | RT-qPCR: FABP4, LPL and PPARG (Control: YWHAZ) |
| Yang et al., 2017 [34]  | 3 mg/mL collagenase type I and 4 mg/mL dispase for 1 hour at 37 °C                              | Yes | *10% FBS<br>*0.4 μg mL <sup>-1</sup> dexamethasone<br>*5 μg mL <sup>-1</sup> insulin<br>*111 μg mL <sup>-1</sup> isobutylmethylxanthine<br>*72 μg mL <sup>-1</sup> indomethacin                                                                                                                                                                                                                 | 14 days | Oil red | —                                              |

## References

- 47 Chang, C.-C.; Chang, K.-C.; Tsai, S.-J.; Chang, H.-H.; Lin, C.-P. Neurogenic differentiation of dental pulp stem cells to neuron-like cells in dopaminergic and motor neuronal inductive media. *Journal of the Formosan Medical Association* **2014**, *113*, 956-965, doi:<https://doi.org/10.1016/j.jfma.2014.09.003>.
